# Supplementary material
Source: ML conference proceedings conference paper supplement (https://openaccess.thecvf.com/content/CVPR2022/html/Stammer_Interactive_Disentanglement_Learning_CVPR_2022_paper.html)
Supplement: Supplementary file 1 [file Stammer_Interactive_Disentanglement_Learning_CVPR_2022_supplemental.pdf]

# Interactive Disentanglement: Learning Concepts by Interacting with their Prototype Representations

## Supplementary Materials

### 1 Hyperparameters and model details

#### 1.1 Interactive Concept Swapping Networks

In our experiments, the prototype slots were initialized randomly from a truncated Gaussian distribution with mean  $\mu = 0$ , variance  $\sigma^2 = 0.5$ , minimum  $a = -1$ , and maximum  $b = 1$ . The encoder used in our experiments was a convolutional neural network with residual connections and ReLU activations. Each read-out encoder is a linear layer with LeakyReLU activations. Lastly, the decoder architecture was again a neural network with transposed convolutions and also here residual layers.

In the standard ECR experiments with iCSNs,  $J = 3$ ,  $Z = 512$ ,  $Q = 128$ ,  $K = 6$  for each  $j \in [1, \dots, J]$ ,  $N = 128$  and  $\tau$  was decreased every 1000 epochs with steps  $[2., 0.5, 0.1, 0.01, 0.001, 0.0001, 0.00001]$  over 8000 epochs in total.

Notably, group normalization as proposed by Wu *et al.* [2] was applied after extracting the concept encodings via the read-out encoders (performed in `collectedReadOutEncoders` in Alg. 1).

Pseudo code can be found in Alg. 1 and Alg. 2.

#### 1.2 Baseline models

For the experiments with Cat-VAE, the softmax temperature was set to  $\tau = 0.1$  and each categorical distribution had  $k = 6$  categories. The number of latent variables was set to 3 for Cat-VAE,  $\beta$ -VAE, Ada-VAE, and VAE runs. For all baselines, the encoder and decoder consisted of a convolutional and transposed convolutional network. In all experiments,  $\beta = 4.$ , except for Ada-VAE, where  $\beta = 1.$ , as recommended by Locatello *et al.* [1]. All baseline models were trained for 2000 epochs.

#### 1.3 Linear probing

The linear models for probing the latent representations of the different model configurations were a decision tree and logistic regression model. The max depth of the decision tree was set to 8. The logistic regression model was run with parameters  $C = 0.316$  and the maximum number of iterations at 1000. Both the decision tree and logistic regression model were trained with a fixed random seed.

### 2 Details on simulated interactions

The simulated user interactions were performed via an  $L_2$  regulatory loss term on the latent codes  $y$ .

In case a user tells an iCSN *not* to use a specific prototype slot of the superordinate concept  $j$  and slot  $k$ , this loss corresponds to:  $MSE(y_{j \cdot k + k}, \mathbf{0})$ , where  $y_{j \cdot k + k}$  corresponds to the value of  $y$  at position  $j \cdot k + k$  and  $\mathbf{0}$  being a vector of length  $N$ .

When a user provides a subset of examples with corresponding desired prototype slot IDs the loss term corresponds to:  $MSE(y_{j \cdot k + k}^{subset}, \mathbf{1})$  with  $\mathbf{1}$  of length equal to the number of samples in *subset*. The subset of examples in our simulated interactions were identified via the ground truth labels, e.g., for identifying the subset of images containing a pentagon. The interactions for learning a novel basic concept followed the same procedure.

To allow the model to update its latent space via interactions we increased  $\tau = 0.00001$  back to  $\tau = 0.0001$ .

### References

- [1] Francesco Locatello, Ben Poole, Gunnar Rätsch, Bernhard Schölkopf, Olivier Bachem, and Michael Tschannen. Weakly-supervised disentanglement without compromises. In *International Conference on Machine Learning (ICML)*, 2020.
- [2] Yuxin Wu and Kaiming He. Group normalization. In *European Conference on Computer Vision (ECCV)*, 2018.

---

**Algorithm 1:** Interactive Concept Swapping Network – pair images forward pass

---

**Input** : Image pair  $x \in \mathbb{R}^D, x' \in \mathbb{R}^D$ , known share IDs  $v$ .  
**Output:** Image reconstructions  $\hat{x} \in \mathbb{R}^D, \hat{x}' \in \mathbb{R}^D$ , and latent codes  $y \in [0, 1]^{J \cdot K}, y' \in [0, 1]^{J \cdot K}$

```
1 // Forward pass through initial encoder.  $z \in \mathbb{R}^Z$ 
2  $z \leftarrow f(x)$ 
3  $z' \leftarrow f(x')$ 
4 // Forward pass through  $J$  read-out encoders.  $\phi \in \mathbb{R}^{J \times Q}$ 
5  $\phi \leftarrow \text{collectedReadOutEncoders}(z)$ 
6  $\phi' \leftarrow \text{collectedReadOutEncoders}(z')$ 
7 // Compute the distance of each concept encoding to all prototype slots of its
  corresponding category  $j$ .
8  $y \leftarrow \text{computeProtoDistance}(\phi, v)$ 
9  $y' \leftarrow \text{computeProtoDistance}(\phi', v)$ 
10 // Reconstruct the images from the prototype distance codes.
11  $\hat{y} \leftarrow g(y)$ 
12  $\hat{y}' \leftarrow g(y')$ 
```

---

---

**Algorithm 2:** computeProtoDistance

---

**Input** : Concept encodings  $\phi \in \mathbb{R}^{J \times Q}, \phi' \in \mathbb{R}^{J \times Q}$   
**Given** : Set of prototype slot codebooks  $\Theta := [P_1, \dots, P_J] \in \mathbb{R}^{J \times Q \times K}$ , softmax temperature  $\tau$ , and share IDs  $v$ .  
**Output:** Latent codes  $y \in [0, 1]^{J \cdot K}, y' \in [0, 1]^{J \cdot K}$

```
1 // For every superordinate concept category
2 for  $j \leftarrow 0$  to  $J - 1$  do
3   // Dot-product between concept encoding and all prototype slots from codebook  $P_j$ .
4    $s_j \leftarrow \text{softmaxDotProduct}(\phi_j, P_j)$ 
5    $s'_j \leftarrow \text{softmaxDotProduct}(\phi'_j, P_j)$ 
6   // Compute normalizing weighted softmax.
7    $\Pi_j \leftarrow \text{softmaxNormTau}(s_j, \tau)$ 
8    $\Pi'_j \leftarrow \text{softmaxNormTau}(s'_j, \tau)$ 
9 end for
10 // Swap the distance codes at the position corresponding to the shared IDs.
11  $y \leftarrow [\Pi_1, \dots, \Pi'_v, \dots, \Pi_J]$ 
12  $y' \leftarrow [\Pi'_1, \dots, \Pi_v, \dots, \Pi'_J]$ 
```

---
